# Supplementary material for: Assessment of the Impacts of Anthropogenic Activities on a Large River Using Longfin Eel as a Bioindicator
Source: Preprints.org preprint supplement (doi:10.20944/preprints202009.0211.v1), 2020-09-09
Supplement: Supplementary file 3 [file supplementary]

**Supplementary Material**

Title: Assessment of the Impacts of Anthropogenic Activities on a Large River Using Longfin Eel as a Bioindicator.

Authors: Olivier Champeau, Jamie M. Ataria, Grant L. Northcott, Gen Kume, Andrew Barrick and Louis A. Tremblay

**Chemistry**

**Analytical method detection limits in mg.kg-1 (ppm). MDL: Method of Detection Limit.**

| **Organochlorine Pesticides** | | |
| --- | --- | --- |
| **Compound** | **MDL in sediment** | **MDL in biota** |
| Aldrin | <0.001 | <0.001 |
| alpha-BHC | <0.001 | <0.001 |
| beta-BHC | <0.001 | <0.001 |
| delta-BHC | <0.001 | <0.001 |
| gamma-BHC (Lindane) | <0.001 | <0.001 |
| cis-Chlordane | <0.001 | <0.001 |
| trans-chlordane | <0.001 | <0.001 |
| Equivalent tech chlordane | <0.002 | <0.002 |
| 2,4'-DDD | <0.001 | <0.001 |
| 4,4'-DDD | <0.001 | <0.001 |
| 2,4'-DDE | <0.001 | <0.001 |
| 4,4'-DDE | <0.001 | <0.001 |
| 2,4'-DDT | <0.001 | <0.001 |
| 4,4'-DDT | <0.001 | <0.001 |
| Endosulfan I | <0.001 | <0.001 |
| Endosulfan sulfate | <0.001 | <0.001 |
| Endrin ketone | <0.001 | <0.001 |
| Heptachlor | <0.001 | <0.001 |
| Heptachlor epoxide | <0.001 | <0.001 |
| Hexachlorobenzene | <0.001 | <0.001 |

| **Chlorinated phenols** | | |
| --- | --- | --- |
| **Compound** | **MDL in sediment** | **MDL in biota** |
| 2,4,6 trichlorophenol | 0.001 | N/A |
| 2,3,5 trichlorophenol | 0.001 | N/A |
| 2,4,5 trichlorophenol | 0.001 | N/A |
| 2,3,6 trichlorophenol | 0.001 | N/A |
| 2,3,4 trichlorophenol | 0.001 | N/A |
| 2,3,5,6, tetrachlorophenol | 0.001 | N/A |
| 2,3,4,6 tetrachlorophenol | 0.001 | N/A |
| 2,3,4,5 tetrachlorophenol | 0.001 | N/A |
| pentachlorophenol | 0.001 | N/A |

| **Polychlorinated biphenyls** | | |
| --- | --- | --- |
| **Compound** | **MDL in sediment** | **MDL in biota** |
| PCB-18 | <0.001 | <0.001 |
| PCB-28 | <0.001 | <0.001 |
| PCB-31 | <0.001 | <0.001 |
| PCB-44 | <0.001 | <0.001 |
| PCB-49 | <0.001 | <0.001 |
| PCB-52 | <0.001 | <0.001 |
| PCB-60 | <0.001 | <0.001 |
| PCB-77 | <0.001 | <0.001 |
| PCB-81 | <0.001 | <0.001 |
| PCB-86 | <0.001 | <0.001 |
| PCB-101 | <0.001 | <0.001 |
| PCB-105 | <0.001 | <0.001 |
| PCB-110 | <0.001 | <0.001 |
| PCB-114 | <0.001 | <0.001 |
| PCB-118 | <0.001 | <0.001 |
| PCB-121 | <0.001 | <0.001 |
| PCB-123 | <0.001 | <0.001 |
| PCB-126 | <0.001 | <0.001 |
| PCB-128 | <0.001 | <0.001 |
| PCB-138 | <0.001 | <0.001 |
| PCB-141 | <0.001 | <0.001 |
| PCB-149 | <0.001 | <0.001 |
| PCB-151 | <0.001 | <0.001 |
| PCB-153 | <0.001 | <0.001 |
| PCB-156 | <0.001 | <0.001 |
| PCB-157 | <0.001 | <0.001 |
| PCB-159 | <0.001 | <0.001 |
| PCB-167 | <0.001 | <0.001 |
| PCB-169 | <0.001 | <0.001 |
| PCB-170 | <0.001 | <0.001 |
| PCB-180 | <0.001 | <0.001 |
| PCB-189 | <0.001 | <0.001 |
| PCB-194 | <0.001 | <0.001 |
| PCB-206 | <0.001 | <0.001 |
| PCB-209 | <0.001 | <0.001 |
| Sum of 35 PCB congeners | <0.04 | <0.04 |

| **Polycyclic Aromatic Hydrocarbons** | | |
| --- | --- | --- |
| **Compound** | **MDL in sediment** | **MDL in biota** |
| Acenaphthene | <0.001 | <0.001 |
| Acenaphthylene | <0.001 | <0.001 |
| Anthracene | <0.001 | <0.001 |
| Benzo[a]anthracene | <0.001 | <0.001 |
| Benzo[a]pyrene (BAP) | <0.001 | <0.001 |
| Benzo[b]fluoranthene + Benzo[j]fluoranthene | <0.001 | <0.001 |
| Benzo[g,h,i]perylene | <0.001 | <0.001 |
| Benzo[k]fluoranthene | <0.001 | <0.001 |
| Chrysene | <0.001 | <0.001 |
| Dibenzo[a,h]anthracene | <0.001 | <0.001 |
| Fluoranthene | <0.001 | <0.001 |
| Fluorene | <0.001 | <0.001 |
| Indeno(1,2,3-c,d)pyrene | <0.001 | <0.001 |
| Naphthalene | <0.001 | <0.001 |
| Phenanthrene | <0.001 | <0.001 |
| Pyrene | <0.001 | <0.001 |
| Sum of 16 PAHs | <0.02 | <0.02 |

| **Total Recoverable Heavy Metals** | | |
| --- | --- | --- |
|  | **MDL in sediment** | **MDL in biota** |
| Cadmium | 0.010 | 0.0020 |
| Chromium | 0.20 | N/A |
| Copper | 0.20 | 0.050 |
| Lead | 0.040 | 0.010 |
| Mercury | 0.010 | 0.010 |
| Zinc | 0.40 | 0.50 |

**Concentration of trace metals in sediment** **samples from the Matāura River in mg.kg-1 (ppm) dry weight**

|  | **Piano flat** | | **Gore** | | **Mataura** | | | **Tuturau** | | | **Wyndham** | | **Gorge Road** | | **Niagara** | | |
| --- | --- | --- | --- | --- | --- | --- | --- | --- | --- | --- | --- | --- | --- | --- | --- | --- | --- |
|  | Spring | Summer | Spring | Summer | | Spring | Summer | | Spring | Summer | Spring | Summer | Spring | Summer | | Spring | Summer |
| Cadmium | 0.04 | 0.053 | 0.03 | 0.038 | | 0.040 | 0.043 | | 0.07 | 0.039 | 0.060 | 0.069 | 0.38 | N/A | | 0.13 | 0.04 |
| Chromium | N/A | 9.3 | N/A | 8.3 | | N/A | 8.0 | | N/A | 8.3 | N/A | 10.0 | N/A | N/A | | N/A | 9.5 |
| Copper | 12.4 | 6.7 | 12.0 | 7.4 | | 8.5 | 6.2 | | 5.8 | 7.8 | 8.9 | 12.0 | 0.46.8 | N/A | | 17.9 | 15 |
| Lead | 9.43 | 6.3 | 5.09 | 5.90 | | 9.16 | 5.2 | | 9.24 | 6.4 | 9.30 | 9.10 | 0.76 | N/A | | 15.7 | 9.7 |
| Mercury | 0.07 | <0.010 | 0.03 | <0.010 | | 0.06 | 0.011 | | 0.04 | <0.010 | 0.05 | 0.028 | 0.13 | N/A | | 0.13 | <0.010 |
| Zinc | 44.9 | 46 | 25.2 | 32 | | 45.1 | 30 | | 105 | 31 | 76.8 | 47.0 | 226 | N/A | | 64.4 | 53 |

**Concentrations of chlorophenol residues in sediment samples from the Matāura River in g.kg-1 (ppb) dry weight of sample**

|  | **Piano flat** | | **Gore** | | **Mataura** | | | **Tuturau** | | **Wyndham** | | **Gorge Road** | | **Niagara** | |
| --- | --- | --- | --- | --- | --- | --- | --- | --- | --- | --- | --- | --- | --- | --- | --- |
|  | Spring | Summer | Spring | Summer | | Spring | Summer | Spring | Summer | Spring | Summer | Spring | Summer | Spring | Summer |
| 2,4,6 trichlorophenol | N.D | N/A | N.D | N/A | | N.D | N/A | N.D | N/A | N.D | N/A | 2.4 | N/A | N/A | N.D |
| 2,3,5 trichlorophenol | N.D | N/A | N.D | N/A | | N.D | N/A | N.D | N/A | N.D | N/A | N.D | N/A | N/A | N.D |
| 2,4,5 trichlorophenol | N.D | N/A | N.D | N/A | | N.D | N/A | N.D | N/A | N.D | N/A | N.D | N/A | N/A | N.D |
| 2,3,6 trichlorophenol | N.D | N/A | N.D | N/A | | N.D | N/A | N.D | N/A | N.D | N/A | 0.7 | N/A | N/A | N.D |
| 2,3,4 trichlorophenol | N.D | N/A | N.D | N/A | | N.D | N/A | N.D | N/A | N.D | N/A | N.D | N/A | N/A | N.D |
| 2,3,5,6 tetrachlorophenol | N.D | N/A | N.D | N/A | | N.D | N/A | N.D | N/A | N.D | N/A | N.D. | N/A | N/A | N.D |
| 2,3,4,6 tetrachlorophenol | N.D | N/A | N.D | N/A | | N.D | N/A | N.D | N/A | N.D | N/A | N.D | N/A | N/A | N.D |
| 2,3,4,5 tetrachlorophenol | N.D | N/A | N.D | N/A | | N.D | N/A | N.D | N/A | N.D | N/A | 1.0 | N/A | N/A | N.D |
| pentachlorophenol | N.D | N/A | N.D | N/A | | N.D | N/A | 1.6 | N/A | N.D | N/A | 2.1 | N/A | N/A | N.D |
| **Total** | **N.D** | **N/A** | **N.D** | **N/A** | | **N.D** | **N/A** | **1.6** | **N/A** | **N.D** | **N/A** | **6.2** | **N/A** | **N/A** | **N.D** |

N.D = not detected, N/A = not analysed

**Concentration of organochlorine pesticide residues in sediment** **samples from the Matāura River in g.kg-1 (ppb) dry weight of sample**

|  | **Piano flat** | | **Gore** | | **Mataura** | | | **Tuturau** | | **Wyndham** | | **Gorge Road** | | **Niagara** | |
| --- | --- | --- | --- | --- | --- | --- | --- | --- | --- | --- | --- | --- | --- | --- | --- |
|  | Spring | Summer | Spring | Summer | | Spring | Summer | Spring | Summer | Spring | Summer | Spring | Summer | Spring | Summer |
| o,p'-DDE | N.D. | N.D | N.D | N.D | | N.D | N.D | N.D | N.D | N.D | N.D | 0.07 | N.D | N.D | N.D |
| p,p'-DDE | 0.23 | N.D | 0.13 | N.D | | 0.17 | N.D | 0.29 | N.D | 0.53 | N.D | 1.59 | N.D | 0.85 | N.D |
| o,p DDD | 0.05 | N.D | n.d. | N.D | | n.d. | N.D | N.D | N.D | 0.08 | N.D | 1.42 | N.D | N.D | N.D |
| p,p DDD | 0.33 | N.D | 0.33 | N.D | | 0.10 | N.D | 0.22 | N.D | 0.41 | N.D | 6.56 | N.D | 0.24 | N.D |
| o,p'-DDT | N.D | N.D | N.D | N.D | | N.D | N.D | N.D | N.D | N.D | N.D | N.D | N.D | N.D | N.D |
| p,p DDT | N.D | N.D | N.D | N.D | | N.D | N.D | N.D | N.D | N.D | N.D | N.D | N.D | N.D. | N.D |
| **Total DDT** | **0.61** | **N.D** | **0.46** | **N.D** | | **0.27** | **N.D** | **0.51** | **N.D** | **1.02** | **N.D** | **9.64** | **N.D** | **1.09** | **N.D** |
|  |  |  |  |  | |  |  |  |  |  |  |  |  |  |  |
| cis-chlordane | N.D | N.D | N.D | N.D | | N.D | N.D | N.D | N.D | N.D | N.D | N.D | N.D | N.D | N.D |
| trans-chlordane | N.D | N.D | N.D | N.D | | N.D | N.D | N.D | N.D | N.D | N.D | N.D | N.D | N.D | N.D |
| **Equival Technical** | **N.D** | **N.D** | **N.D** | **N.D** | | **N.D** | **N.D** | **N.D** | **N.D** | **N.D** | **N.D** | **N.D** | **N.D** | **N.D** | **N.D** |
|  |  |  |  |  | |  |  |  |  |  |  |  |  |  |  |
| alpha-BHC | N/A | N/A | N/A | N/A | | N/A | N/A | N/A | N/A | N/A | N/A | N/A | N/A | N/A | N/A |
| beta-BHC | N/A | N/A | N/A | N/A | | N/A | N/A | N/A | N/A | N/A | N/A | N/A | N/A | N/A | N/A |
| delta-BHC | N/A | N/A | N/A | N/A | | N/A | N/A | N/A | N/A | N/A | N/A | N/A | N/A | N/A | N/A |
| gamma.-BHC (Lindane) | N.D | N.D | N.D | N.D | | N.D | N.D | N.D | N.D | N.D | N.D | N.D | N.D | N.D | N.D |
| Aldrin | N/A | N.D | N/A | N.D | | N/A | N.D | N/A | N.D | N/A | N.D | N/A | N.D | N/A | N.D |
| Dieldrin | N.D | N.D | N.D | N.D | | N.D | N.D | 0.10 | N.D | N.D | N.D | N.D | N.D | N.D | N.D |
| Endrin | N.D | N.D | N.D | N.D | | N.D | N.D | N.D | N.D | N.D | N.D | N.D | N.D | N.D | N.D |
| Endrin aldehyde | N/A | N.D | N/A | N.D | | N/A | N.D | N/A | N.D | N/A | N.D | N/A | N.D | N/A | N.D |
| Endrin Ketone | N/A | N.D | N/A | N.D | | N/A | N.D | N/A | N.D | N/A | N.D | N/A | N.D | N/A | N.D |
| Endosulfan I | N/A | N.D | N/A | N.D | | N/A | N.D | N/A | N.D | N/A | N.D | N/A | N.D | N/A | N.D |
| Endosulfan II | N/A | N.D | N/A | N.D | | N/A | N.D | N/A | N.D | N/A | N.D | N/A | N.D | N/A | N.D |
| Endosulfan sulphate | N/A | N.D | N/A | N.D | | N/A | N.D | N/A | N.D | N/A | N.D | N/A | N.D | N/A | N.D |
| Heptachlor | N.D | N.D | N.D | N.D | | N.D | N.D | N.D | N.D | N.D | N.D | N.D | N.D | N.D | N.D |
| heptachlor epoxide | N.D | N.D | N.D | N.D | | N.D | N.D | N.D | N.D | N.D | N.D | N.D | N.D | N.D | N.D |
| Hexachlorobenzene | N.D | N.D | N.D | N.D | | N.D | N.D | N.D | N.D | N.D | N.D | N.D | N.D | N.D | N.D |
| Methoxychlor | N/A | N.D | N/A | N.D | | N/A | N.D | N/A | N.D | N/A | N.D | N/A | N.D | N/A | N.D |
| oxychlordane | N.D | N/A | N.D | N/A | | N.D | N/A | N.D | N/A | N.D | N/A | N.D | N/A | N.D | N/A |

N.D = not detected, N/A = not analysed

**Polychlorinated biphenyls residues in sediment** **samples from the Matāura River in g.kg-1 (ppb) dry weight of sample**

|  | **Piano flat** | | **Gore** | | **Mataura** | | | **Tuturau** | | **Wyndham** | | **Gorge Road** | | **Niagara** | |
| --- | --- | --- | --- | --- | --- | --- | --- | --- | --- | --- | --- | --- | --- | --- | --- |
|  | Spring | Summer | Spring | Summer | | Spring | Summer | Spring | Summer | Spring | Summer | Spring | Summer | Spring | Summer |
| PCB 15 | N.D | N.D | N.D | N.D | | N.D | N.D | N.D | N.D | N.D | N.D | 0.06 | N.D | N.D | N.D |
| PCB 18 | N.D | N.D | N.D | N.D | | N.D | N.D | N.D | N.D | N.D | N.D | 0.12 | N.D | N.D | N.D |
| PCB 28+31 | N.D | N.D | N.D | N.D | | N.D | N.D | N.D | N.D | N.D | N.D | 0.20 | N.D | N.D | N.D |
| PCB 40 | N.D | N.D | N.D | N.D | | N.D | N.D | N.D | N.D | N.D | N.D | N.D | N.D | N.D | N.D |
| PCB 44 | N.D | N.D | N.D | N.D | | N.D | N.D | N.D | N.D | N.D | N.D | N.D | N.D | N.D | N.D |
| PCB 47 | N.D | N.D | N.D | N.D | | N.D | N.D | 0.05 | N.D | N.D | N.D | 0.08 | N.D | N.D | N.D |
| PCB 49 | N.D | N.D | N.D | N.D | | N.D | N.D | N.D | N.D | N.D | N.D | N.D | N.D | N.D | N.D |
| PCB 52 | N.D | N.D | N.D | N.D | | N.D | N.D | N.D | N.D | N.D | N.D | 0.12 | N.D | N.D | N.D |
| PCB 54 | N.D | N.D | N.D | N.D | | N.D | N.D | N.D | N.D | N.D | N.D | N.D | N.D | N.D | N.D |
| PCN 77 | N.D | N.D | N.D | N.D | | N.D | N.D | N.D | N.D | N.D | N.D | N.D | N.D | N.D | N.D |
| PCB 87 | N.D | N.D | N.D | N.D | | N.D | N.D | 0.09 | N.D | 0.13 | N.D | 0.56 | N.D | N.D | N.D |
| PCB 101 | N.D | N.D | N.D | N.D | | N.D | N.D | N.D | N.D | N.D | N.D | 0.27 | N.D | N.D | N.D |
| PCB 105 | N.D | N.D | N.D | N.D | | N.D | N.D | N.D | N.D | 0.08 | N.D | 0.50 | N.D | N.D | N.D |
| PCB 110 | N.D | N.D | N.D | N.D | | N.D | N.D | 0.05 | N.D | 0.08 | N.D | 0.51 | N.D | N.D | N.D |
| PCB 118 | N.D | N.D | N.D | N.D | | N.D | N.D | 0.07 | N.D | 0.11 | N.D | 0.58 | N.D | N.D | N.D |
| PCB 121 | N.D | N.D | N.D | N.D | | N.D | N.D | N.D | N.D | N.D | N.D | 0.14 | N.D | N.D | N.D |
| PCB 138 | N.D | N.D | N.D | N.D | | N.D | N.D | 0.06 | N.D | 0.09 | N.D | 0.24 | N.D | N.D | N.D |
| PCB 141 | N.D | N.D | N.D | N.D | | N.D | N.D | 0.07 | N.D | N.D | N.D | N.D | N.D | N.D | N.D |
| PCB 151 | N.D | N.D | N.D | N.D | | N.D | N.D | N.D | N.D | N.D | N.D | N.D | N.D | N.D | N.D |
| PCB 153 | N.D | N.D | N.D | N.D | | 0.05 | N.D | 0.08 | N.D | 0.16 | N.D | 0.33 | N.D | N.D | N.D |
| PCB 156 | N.D | N.D | N.D | N.D | | N.D | N.D | N.D | N.D | N.D | N.D | N.D | N.D | N.D | N.D |
| PCB 170 | N.D | N.D | N.D | N.D | | N.D | N.D | N.D | N.D | N.D | N.D | N.D | N.D | N.D | N.D |
| PCB 180 | N.D | N.D | N.D | N.D | | N.D | N.D | N.D | N.D | N.D | N.D | 0.17 | N.D | N.D | N.D |
| PCB 185 | N.D | N.D | N.D | N.D | | N.D | N.D | N.D | N.D | N.D | N.D | N.D | N.D | N.D | N.D |
| PCB 194 | N.D | N.D | N.D | N.D | | N.D | N.D | N.D | N.D | N.D | N.D | N.D | N.D | N.D | N.D |
| PCB 195 | N.D | N.D | N.D | N.D | | N.D | N.D | N.D | N.D | N.D | N.D | N.D | N.D | N.D | N.D |
| PCB 206 | N.D | N.D | N.D | N.D | | N.D | N.D | N.D | N.D | N.D | N.D | N.D | N.D | N.D | N.D |
| PCB 209 | N.D | N.D | N.D | N.D | | N.D | N.D | N.D | N.D | N.D | N.D | N.D | N.D | N.D | N.D |
| **Total** | **N.D** | **N.D** | **N.D** | **N.D** | | **0.05** | **N.D** | **0.47** | **N.D** | **0.65** | **N.D** | **3.88** | **N.D** | **N.D** | **N.D** |

N.D = not detected, N/A = not analysed

**Polycyclic aromatic hydrocarbons residues in Spring sediment samples from the Matāura River in g.kg-1 (ppb) dry weight of sample**

|  | **Piano flat** | **Gore** | **Mataura** | **Tuturau** | **Wyndham** | **Gorge Road** | **Niagara** |
| --- | --- | --- | --- | --- | --- | --- | --- |
| Anthracene | 2.93 | 3.72 | 1.46 | 3.18 | 5.23 | 143 | 2.92 |
| Benzo[a]anthracene/chrysene | 21.6 | 31.5 | 6.63 | 12.1 | 19 | 901 | 9.2 |
| Benzo[a]pyrene | 10.3 | 17.6 | 5.4 | 8.51 | 13.6 | 680 | 11.2 |
| Benzo[b+j]fluoranthene | 21.1 | 16.4 | 7.15 | 12.6 | 18.9 | 680 | 14.0 |
| Benzo[k]fluoranthene | 4.79 | 7.15 | 2.55 | 4.36 | 6.81 | 343 | 3.64 |
| Benzo[ghi]perylene | 8.60 | 9.54 | 4.37 | 8.43 | 12.1 | 380 | 6.55 |
| Dibenzo[a,h]anthracene | 6.99 | 9.21 | 2.49 | 12.6 | 7.26 | 330 | 2.76 |
| Fluoranthene | 19.9 | 22.3 | 7.15 | 12.6 | 19.4 | 1149 | 18.3 |
| Pyrene | 22.9 | 27.5 | 8.31 | 13.2 | 21.4 | 1332 | 10.4 |
| **Total** | **119** | **145** | **46** | **88** | **124** | **5939** | **79** |

**Polycyclic aromatic hydrocarbons residues in Summer sediment samples from the Matāura River in g.kg-1 (ppb) dry weight of sample**

|  | **Piano flat** | **Gore** | **Mataura** | **Tuturau** | **Wyndham** | **Gorge Road** | **Niagara** |
| --- | --- | --- | --- | --- | --- | --- | --- |
| Acenaphthene | N.D | N.D | N.D | N.D | N.D | N.D | N.D |
| Acenaphthylene | N.D | N.D | N.D | N.D | N.D | N.D | N.D |
| Anthracene | N.D | N.D | N.D | N.D | N.D | N.D | N.D |
| Benzo[a]anthracene | N.D | N.D | N.D | 2.0 | 3.0 | N.D | N.D |
| Benzo[a]pyrene | N.D | N.D | N.D | N.D | 3.0 | N.D | N.D |
| Benzo[b+j]fluoranthene | N.D | N.D | N.D | 2.0 | 3.0 | N.D | N.D |
| Benzo[k]fluoranthene | N.D | N.D | N.D | N.D | N.D | N.D | N.D |
| Benzo[ghi]perylene | N.D | N.D | N.D | N.D | N.D | N.D | N.D |
| Chrysene | N.D | N.D | N.D | 2.0 | 2.0 | N.D | N.D |
| Dibenzo[a,h]anthracene | N.D | N.D | N.D | N.D | N.D | N.D | N.D |
| Fluoranthene | N.D | N.D | N.D | 5.0 | 6.0 | 3.0 | N.D |
| Fluorene | N.D | N.D | N.D | N.D | N.D | N.D | N.D |
| Indeno[1,2,3-cd]pyrene | N.D | N.D | N.D | N.D | N.D | N.D | N.D |
| Naphthalene | N.D | N.D | N.D | N.D | N.D | N.D | N.D |
| Phenanthrene | N.D | N.D | N.D | 3.0 | 3.0 | N.D | N.D |
| Pyrene | N.D | N.D | N.D | 5.0 | 6.0 | 4.0 | N.D |
| **Total** | **N.D** | **N.D** | **N.D** | **19.0** | **26.0** | **7.0** | **N.D** |

N.D = not detected

**Trace metal concentration in caged and resident eels (mg.kg-1 (ppm) dry weight of sample). * indicates that values exceeded test limits. N/A indicates values were not collected.**

|  | **Spring** | | | | **Summer** | | |
| --- | --- | --- | --- | --- | --- | --- | --- |
|  | **Cage up** | | **Cage down** | **Resident** | **Cage up** | **Cage down** | **Resident** |
|  | **Piano Flat** | | | | | | |
|  | E1 | E2 | | E13 | E19 | E20 | E33 |
| Cadmium | 0.073 | 0.066 | | < 0.028 | < 0.049 | < 0.032 | 0.054 |
| Copper | 10 | 7.8 | | 2.8 | 11* | 2.2 | 7.5 |
| Lead | 1.1 | 0.97 | | < 0.14 | < 0.25 | < 0.16 | < 0.20 |
| Mercury | 1.3 | 1.7 | | 1.4 | 2.4 | 2.7 | 2.9 |
| Zinc | 130 | 120 | | 120 | 280* | 170 | 210 |
|  | **Gore** | | | | | | |
|  |  | E3 | | E14 | E21 | E22 | E34 |
| Cadmium | N/A | 0.068 | | < 0.030 | < 0.032 | 0.054 | 0.033 |
| Copper | N/A | 9.5 | | 3.9 | 2.2 | 2.6 | 6.7 |
| Lead | N/A | 1.2 | | < 0.15 | < 0.16 | < 0.17 | < 0.16 |
| Mercury | N/A | 1.7 | | 1.6 | 2.7 | 2.8 | 1.9 |
| Zinc | N/A | 110 | | 120 | 170 | 190 | 140 |
|  | **Mataura** | | | | | | |
|  | E4 | E5 | | E15 | E23 | E24 | E35 |
| Cadmium | 0.085 | 0.063 | | 0.11 | 0.039 | 0.043 | 0.052 |
| Copper | 12 | 9.3 | | 4.5 | 3.1 | 2.5 | 8.6 |
| Lead | 1.3 | 1.2 | | 0.25 | < 0.18 | < 0.17 | 0.31 |
| Mercury | 3.5 | 1.5 | | 3.1 | 2.8 | 2.6 | 3.6 |
| Zinc | 140 | 110 | | 200 | 220 | 190 | 220 |
|  | **Tuturau** | | | | | | |
|  | E6 | E7 | | E16 | E25 | E26 | E36 |
| Cadmium | 0.073 | 0.089 | | < 0.038 | < 0.029 | 0.041 | < 0.037 |
| Copper | 9.8 | 10 | | 4.6 | 2.2 | 2.9 | 9.6 |
| Lead | 1.2 | 1.2 | | < 0.19 | < 0.15 | < 0.19 | < 0.19 |
| Mercury | 2 | 1.7 | | 2.1 | 1.8 | 1.4 | 2.4 |
| Zinc | 150 | 160 | | 200 | 160 | 240 | 230 |
|  | **Wyndham** | | | | | | |
|  | E8 | E9 | | E17 | E27 | E28 | E37 |
| Cadmium | 0.062 | 0.062 | | < 0.035 | < 0.030 | < 0.029 | < 0.031 |
| Copper | 8.9 | 8.9 | | 5 | 2.2 | 2.1 | 5 |
| Lead | 1.1 | 1 | | < 0.18 | < 0.15 | < 0.15 | 0.15 |
| Mercury | 1.4 | 1.2 | | 2.5 | 2.5 | 2 | 1.6 |
| Zinc | 110 | 110 | | 140 | 130 | 130 | 150 |
|  | **Gorge Road** | | | | | | |
|  | E10 |  | |  | E29 | E30 | E38 |
| Cadmium | 0.094 | N/A | | N/A | < 0.033 | < 0.027 | < 0.031 |
| Copper | 12 | N/A | | N/A | 2.3 | 2.1 | 12 |
| Lead | 1.5 | N/A | | N/A | < 0.17 | < 0.14 | 1.9 |
| Mercury | 2.7 | N/A | | N/A | 2.2 | 1.6 | 1.8 |
| Zinc | 190 | N/A | | N/A | 140 | 140 | 160 |
|  | **Niagara** | | | | | | |
|  | E11 | E12 | | E18 | E31 | E32 | E39 |
| Cadmium | 0.086 | < 0.031 | | 0.046 | 0.035 | 0.15 | < 0.045 |
| Copper | 11 | 3.2 | | 6.7 | 2.6 | 3.1 | 15 |
| Lead | 1.5 | 0.18 | | < 0.22 | < 0.18 | < 0.17 | 0.38 |
| Mercury | 1.3 | 1.5 | | 8.6 | 2.7 | 1.5 | 9.8 |
| Zinc | 110 | 120 | | 230 | 170 | 170 | 260 |
|  | **Control sample** | | | | | | |
| Cadmium |  | 0.033 | |  |  | 0.09 |  |
| Copper |  | 2.3 | |  |  | 12 |  |
| Lead |  | < 0.13 | |  |  | < 0.21 |  |
| Mercury |  | 2 | |  |  | 3 |  |
| Zinc |  | 105 | |  |  | 280 |  |

**Concentrations of organochlorine pesticide residues in eels (g.kg-1 (ppb) dry weight of sample)**

|  | Piano flat | | Gore | | Mataura | | Tuturau | | Wyndham | | Gorge Road | | Niagara | | Control |
| --- | --- | --- | --- | --- | --- | --- | --- | --- | --- | --- | --- | --- | --- | --- | --- |
|  | Spring | Summer | Spring | Summer | Spring | Summer | Spring | Summer | Spring | Summer | Spring | Summer | Spring | Summer |  |
| o,p'-DDE | N.D | N.D | N.D | N.D | N.D | N.D | N.D | N.D | N.D | N.D | N.D | N.D | N.D | N.D | N.D |
| p,p'-DDE | 194 | 220 | 330 | 210 | 290 | 191 | 300 | 260 | 370 | 270 | 320 | 290 | 300 | 152 | 188 |
| o,p DDD | N.D | N.D | N.D | N.D | N.D | N.D | N.D | N.D | N.D | N.D | N.D | N.D | N.D | N.D | N.D |
| p,p DDD | 21.0 | 11.3 | 38.0 | 15.8 | 23.0 | 10.9 | 31.0 | 10.7 | 44.0 | 17.0 | 36.0 | 13.5 | 34.0 | 8.6 | 11.1 |
| o,p'-DDT | N.D | N.D | 1.0 | N.D | 1.0 | N.D | 1.0 | N.D | N.D | N.D | 1.0 | N.D | N.D | N.D | N.D |
| p,p DDT | 12.9 | 27.0 | 24.0 | 17.5 | 23.0 | 17.8 | 19.7 | 16.9 | 25.0 | 37 | 22.0 | 21.0 | 20.0 | 13.1 | 15.8 |
| Total DDT | 228 | 258 | 393 | 243 | 337 | 220 | 352 | 288 | 439 | 324 | 379 | 325 | 354 | 174 | 215 |
|  |  |  |  |  |  |  |  |  |  |  |  |  |  |  |  |
| cis-chlordane | N.D | N.D | N.D | N.D | N.D | N.D | N.D | N.D | N.D | N.D | N.D | N.D | N.D | N.D | N.D |
| trans-chlordane | N.D | N.D | N.D | N.D | N.D | N.D | N.D | N.D | N.D | N.D | N.D | N.D | N.D | N.D | N.D |
| Equival Technical | N.D | N.D | N.D | N.D | N.D | N.D | N.D | N.D | N.D | N.D | N.D | N.D | N.D | N.D | N.D |
|  |  |  |  |  |  |  |  |  |  |  |  |  |  |  |  |
| alpha-BHC | N.D | N.D | N.D | N.D | N.D | N.D | N.D | N.D | N.D | N.D | N.D | N.D | N.D | N.D | N.D |
| beta-BHC | N.D | N.D | N.D | N.D | N.D | N.D | N.D | N.D | N.D | N.D | N.D | N.D | N.D | N.D | N.D |
| delta-BHC | N.D | N.D | N.D | N.D | N.D | N.D | N.D | N.D | N.D | N.D | N.D | N.D | N.D | N.D | N.D |
| gamma.-BHC (Lindane) | N.D | N.D | N.D | N.D | N.D | N.D | N.D | N.D | N.D | N.D | N.D | N.D | N.D | N.D | N.D |
| Aldrin | N.D | N.D | N.D | N.D | N.D | N.D | N.D | N.D | N.D | N.D | N.D | N.D | N.D | N.D | N.D |
| Endrin Ketone | N.D | N.D | N.D | N.D | N.D | N.D | N.D | N.D | N.D | N.D | N.D | N.D | N.D | N.D | N.D |
| Endosulfan I | N.D | N.D | N.D | N.D | N.D | N.D | N.D | N.D | N.D | N.D | N.D | N.D | N.D | N.D | N.D |
| Endosulfan sulphate | N.D | N.D | N.D | N.D | N.D | N.D | N.D | N.D | N.D | N.D | N.D | N.D | N.D | N.D | N.D |
| Heptachlor | N.D | N.D | N.D | N.D | N.D | N.D | N.D | N.D | N.D | N.D | N.D | N.D | N.D | N.D | N.D |
| heptachlor epoxide | N.D | N.D | N.D | N.D | N.D | N.D | N.D | N.D | N.D | N.D | N.D | N.D | N.D | N.D | N.D |
| Hexachlorobenzene | N.D | N.D | N.D | N.D | N.D | N.D | N.D | N.D | N.D | N.D | N.D | N.D | N.D | N.D | N.D |

N.D = not detected

**Concentrations of polychlorinated biphenyl residues in eels (g.kg-1 (ppb) dry weight of sample). * indicates that values exceeded testing guidelines. N.D indicates that concentrations were below detection limits**

|  | **Piano flat** | | **Gore** | | **Mataura** | | | **Tuturau** | | **Wyndham** | | **Gorge Road** | | **Niagara** | | | **Control** |
| --- | --- | --- | --- | --- | --- | --- | --- | --- | --- | --- | --- | --- | --- | --- | --- | --- | --- |
|  | Spring | Summer | Spring | Summer | | Spring | Summer | Spring | Summer | Spring | Summer | Spring | Summer | Spring | Summer |  | |
| PCB 18 | N.D | N.D | N.D | N.D | | N.D | N.D | N.D | N.D | N.D | N.D | N.D | N.D | N.D | N.D | N.D | |
| PCB 28 | N.D | N.D | N.D | N.D | | N.D | N.D | N.D | N.D | N.D | N.D | N.D | N.D | N.D | N.D | N.D | |
| PCB 31 | N.D | N.D | N.D | N.D | | N.D | N.D | N.D | N.D | N.D | N.D | N.D | N.D | N.D | N.D | N.D | |
| PCB 40 | N.D | N.D | N.D | N.D | | N.D | N.D | N.D | N.D | N.D | N.D | N.D | N.D | N.D | N.D | N.D | |
| PCB 44 | N.D | N.D | N.D | N.D | | N.D | N.D | N.D | N.D | N.D | **1.6*** | N.D | N.D | N.D | N.D | N.D | |
| PCB 49 | N.D | N.D | N.D | N.D | | N.D | N.D | N.D | N.D | N.D | **1.3*** | N.D | N.D | N.D | N.D | N.D | |
| PCB 52 | N.D | N.D | N.D | N.D | | **1.0*** | N.D | N.D | **1.0*** | **1.1*** | **3.8*** | N.D | N.D | N.D | 1.0 | N.D | |
| PCB 60 | N.D | N.D | N.D | N.D | | N.D | N.D | N.D | N.D | N.D | N.D | N.D | N.D | N.D | N.D | N.D | |
| PCN 77 | N.D | N.D | N.D | N.D | | N.D | N.D | N.D | N.D | N.D | N.D | N.D | N.D | N.D | N.D | N.D | |
| PCB 81 | N.D | N.D | N.D | N.D | | N.D | N.D | N.D | N.D | N.D | N.D | N.D | N.D | N.D | N.D | N.D | |
| PCB 86 | N.D | N.D | N.D | N.D | | N.D | N.D | N.D | N.D | N.D | N.D | N.D | N.D | N.D | N.D | N.D | |
| PCB 101 | **1.0** | **1.0** | **1.0** | **1.2*** | | **2.8*** | **1.6*** | **1.2*** | **2.3*** | 7.7 | **8.3*** | **N.D** | **1.2*** | **1.0** | **1.6*** | **1.0** | |
| PCB 105 | N.D | N.D | N.D | N.D | | N.D | N.D | N.D | N.D | N.D | **2.5*** | N.D | N.D | N.D | N.D | N.D | |
| PCB 110 | N.D | N.D | N.D | N.D | | **1.2*** | N.D | N.D | **1.2*** | **2.6*** | **6.6*** | N.D | **1.0*** | N.D | N.D | N.D | |
| PCB 114 | N.D | N.D | N.D | N.D | | N.D | N.D | N.D | N.D | N.D | N.D | N.D | N.D | N.D | N.D | N.D | |
| PCB 118 | N.D | N.D | **1.0** | **1.0** | | **2.4*** | **1.6*** | **1.0** | **2.4*** | **2.9*** | **7.6*** | N.D | **1.2*** | **1.0** | **1.0** | **1.1** | |
| PCB 121 | N.D | N.D | N.D | N.D | | N.D | N.D | N.D | N.D | N.D | **3.0*** | N.D | N.D | N.D | N.D | N.D | |
| PCB 123 | N.D | N.D | N.D | N.D | | N.D | N.D | N.D | N.D | N.D | N.D | N.D | N.D | N.D | N.D | N.D | |
| PCB 126 | N.D | N.D | N.D | N.D | | N.D | N.D | N.D | N.D | N.D | N.D | N.D | N.D | N.D | N.D | N.D | |
| PCB 128 | N.D | N.D | N.D | N.D | | N.D | N.D | N.D | N.D | **1.1*** | **1.5*** | N.D | N.D | N.D | N.D | N.D | |
| PCB 138 | **1.4** | **1.6** | **2.0*** | **2.4*** | | **4.8*** | **4.0*** | **1.8** | **3.6*** | **14.6*** | **9.5*** | **1.0** | **2.7*** | **1.6** | **1.6** | **1.9** | |
| PCB 141 | N.D | N.D | N.D | N.D | | N.D | N.D | N.D | N.D | **2.5*** | 1.9 | N.D | N.D | N.D | N.D | N.D | |
| PCB 149 | N.D | N.D | **1.0** | **1.3*** | | **1.8*** | **1.9*** | N.D | **1.7*** | **10.2*** | **5.3*** | N.D | **1.2*** | N.D | N.D | **1.0** | |
| PCB 151 | N.D | N.D | N.D | N.D | | N.D | N.D | N.D | N.D | **2.5*** | **1.4*** | N.D | N.D | N.D | N.D | N.D | |
| PCB 153 | **1.3** | **1.5** | **1.7** | **2.5*** | | **4.2*** | **3.6*** | **1.8** | **3.4*** | **14.5*** | **6.4*** | **1.0** | **2.4*** | **1.5** | **1.6** | **2.0** | |
| PCB 156 | N.D | N.D | N.D | N.D | | N.D | N.D | N.D | N.D | **1.0** | **1.1** | N.D | N.D | N.D | N.D | N.D | |
| PCB 157 | N.D | N.D | N.D | N.D | | N.D | N.D | N.D | N.D | N.D | N.D | N.D | N.D | N.D | N.D | N.D | |
| PCB 159 | N.D | N.D | N.D | N.D | | N.D | N.D | N.D | N.D | N.D | N.D | N.D | N.D | N.D | N.D | N.D | |
| PCB 167 | N.D | N.D | N.D | N.D | | N.D | N.D | N.D | N.D | N.D | N.D | N.D | N.D | N.D | N.D | N.D | |
| PCB 169 | N.D | N.D | N.D | N.D | | N.D | N.D | N.D | N.D | N.D | N.D | N.D | N.D | N.D | N.D | N.D | |
| PCB 170 | N.D | N.D | N.D | N.D | | **1.0*** | N.D | N.D | N.D | **3.0*** | **1.3*** | N.D | N.D | N.D | N.D | N.D | |
| PCB 180 | N.D | N.D | N.D | **1.0*** | | **1.7*** | **1.7*** | N.D | **1.2*** | **5.8*** | **2.5*** | N.D | 1.0 | N.D | N.D | N.D | |
| PCB 189 | N.D | N.D | N.D | N.D | | N.D | N.D | N.D | N.D | N.D | N.D | N.D | N.D | N.D | N.D | N.D | |
| PCB 194 | N.D | N.D | N.D | N.D | | N.D | N.D | N.D | N.D | N.D | N.D | N.D | N.D | N.D | N.D | N.D | |
| PCB 206 | N.D | N.D | N.D | N.D | | N.D | N.D | N.D | N.D | N.D | N.D | N.D | N.D | N.D | N.D | N.D | |
| PCB 209 | N.D | N.D | N.D | N.D | | N.D | N.D | N.D | N.D | N.D | N.D | N.D | N.D | N.D | N.D | N.D | |
| **Total** | **3.7** | **4.1** | **6.7** | **9.4** | | **20.9** | **14.4** | **5.8** | **16.8** | **69.5** | **65.6** | **2.0** | **10.7** | **5.1** | **6.8** | **7.0** | |

N.D = not detected

**Concentrations of polycyclic aromatic hydrocarbons (PAHs) residues in eels (g.kg-1 (ppb) dry weight of sample)**

|  | **Piano flat** | | **Gore** | | **Mataura** | | | **Tuturau** | | **Wyndham** | | **Gorge Road** | | **Niagara** | | | **Control** |
| --- | --- | --- | --- | --- | --- | --- | --- | --- | --- | --- | --- | --- | --- | --- | --- | --- | --- |
|  | Spring | Summer | Spring | Summer | | Spring | Summer | Spring | Summer | Spring | Summer | Spring | Summer | Spring | Summer |  | |
| Acenaphthene | N.D | N.D | N.D | N.D | | N.D | N.D | N.D | N.D | N.D | N.D | N.D | N.D | N.D | N.D | N.D | |
| Acenaphthylene | N.D | N.D | N.D | N.D | | N.D | N.D | N.D | N.D | N.D | N.D | N.D | N.D | N.D | N.D | N.D | |
| Anthracene | N.D | N.D | N.D | N.D | | N.D | N.D | N.D | N.D | N.D | N.D | N.D | N.D | 1.3 | N.D | N.D | |
| Benzo[a]anthracene | N.D | N.D | 1.4 | 1.0 | | N.D | N.D | N.D | N.D | N.D | N.D | N.D | N.D | 4.3 | N.D | 1.0 | |
| Benzo[a]pyrene | N.D | N.D | N.D | 1.2 | | N.D | N.D | N.D | N.D | N.D | N.D | N.D | N.D | 2.2 | N.D | N.D | |
| Benzo[b+j]fluoranthene | N.D | N.D | 1.0 | 1.0 | | N.D | N.D | N.D | N.D | N.D | N.D | N.D | N.D | 1.8 | N.D | N.D | |
| Benzo[k]fluoranthene | N.D | N.D | 1.0 | N.D | | N.D | N.D | N.D | N.D | N.D | N.D | N.D | N.D | 1.6 | N.D | N.D | |
| Benzo[ghi]perylene | N.D | N.D | N.D | 1.3 | | N.D | N.D | N.D | N.D | N.D | N.D | N.D | N.D | 1.9 | N.D | N.D | |
| Chrysene | N.D | N.D | 1.3 | N.D | | N.D | N.D | N.D | N.D | N.D | N.D | N.D | N.D | 3.0 | N.D | N.D | |
| Dibenzo[a,h]anthracene | N.D | N.D | N.D | 1.4 | | N.D | N.D | N.D | N.D | N.D | N.D | N.D | N.D | 2.0 | N.D | 1.0 | |
| Fluoranthene | N.D | N.D | 1.0 | N.D | | N.D | N.D | N.D | N.D | N.D | 2.2 | N.D | 1.8 | 5.9 | N.D | 2.0 | |
| Fluorene | N.D | N.D | N.D | N.D | | N.D | N.D | N.D | N.D | N.D | N.D | 1.2 | N.D | N.D | N.D | N.D | |
| Indeno[1,2,3-cd]pyrene | N.D | N.D | N.D | 1.3 | | N.D | N.D | N.D | N.D | N.D | N.D | N.D | N.D | 2.0 | N.D | 1.0 | |
| Naphthalene | N.D | N.D | 6.0 | N.D | | N.D | N.D | N.D | N.D | N.D | N.D | N.D | N.D | N.D | N.D | N.D | |
| Phenanthrene | N.D | 3.1 | N.D | 4.1 | | N.D | 3.1 | N.D | 2.6 | 7.0 | 6.0 | 3.5 | 5.8 | 7.0 | 2.9 | 15.1 | |
| Pyrene | N.D | N.D | 1.0 | N.D | | N.D | N.D | N.D | N.D | N.D | 1.6 | 1.0 | 1.8 | 3.9 | N.D | 3.7 | |
| **Total** | **N.D** | **3.1** | **12.7** | **11.3** | | **N.D** | **3.1** | **N.D** | **2.6** | **7.0** | **9.8** | **5.7** | **9.4** | **36.9** | **2.9** | **23.8** | |

N.D = not detected

**Biomarker values and size details of the fish used in this study at both sampling times.**

**Spring sampling**

| **Site** | **Eels location** | **Length (cm)** | **Weight (g)** | **Liver weight (g)** | **HSI** | **Age (years)** | **GST liver (nmol./min./mg of protein)** | **EROD activity Liver (nmol./min./mg of protein)** | **TBARS Liver (nmol./mg of protein)** | **GST Gills (nmol./min./mg of protein)** | **CAT Gills (nmol./min./mg of protein)** | **TBARS Gills (nmol./mg of protein)** |
| --- | --- | --- | --- | --- | --- | --- | --- | --- | --- | --- | --- | --- |
| Piano Flat | Cage 1 | 52.00 | 306.20 | 4.89 | 1.60 | 21 | 73.1 | 1.19 | 0.430 | 80.44 | 7.86 | 0.028 |
| Piano Flat | Cage 1 | 54.80 | 354.30 | 4.60 | 1.30 | 19 | 133.4 | 0.35 | 0.848 | 97.67 | 8.20 | 0.017 |
| Piano Flat | Cage 1 | 48.40 | 256.10 | 3.79 | 1.48 | n/m | 26.7 | 0.25 | 0.792 | 70.77 | 12.05 | 0.021 |
| Piano Flat | Cage 1 | 50.00 | 323.40 | 4.19 | 1.29 | 17 | 211.8 | 0.63 | 0.921 | 84.90 | 13.54 | 0.036 |
| Piano Flat | Cage 1 | 52.90 | 335.70 | 4.14 | 1.23 | 25 | 119.7 | n/m | 0.843 | 147.91 | 16.35 | 0.072 |
| Piano Flat | Cage 2 | 52.70 | 360.20 | 3.93 | 1.09 | 24 | 23.0 | 0.32 | 0.784 | 73.79 | 16.42 | 0.030 |
| Piano Flat | Cage 2 | 53.20 | 363.60 | 6.27 | 1.72 | 19 | 55.0 | 3.22 | 0.462 | 80.42 | 7.67 | 0.022 |
| Piano Flat | Cage 2 | 50.40 | 261.00 | 4.06 | 1.56 | 16 | 273.8 | 5.21 | 0.638 | 88.15 | 13.21 | 0.022 |
| Piano Flat | Cage 2 | 56.90 | 411.90 | 5.33 | 1.29 | 18 | 290.1 | 0.68 | 0.875 | 101.54 | 13.21 | 0.032 |
| Piano Flat | Cage 2 | 49.90 | 305.20 | 6.21 | 2.03 | n/m | 251.2 | 0.73 | 0.384 | 61.60 | 9.11 | 0.032 |
| Gore | Cage 2 | 54.00 | 375.70 | 5.48 | 1.46 | 17 | 53.2 | 53.30 | 0.506 | 55.88 | 8.13 | 0.024 |
| Gore | Cage 2 | 53.50 | 355.20 | 4.75 | 1.34 | 24 | 92.2 | 0.25 | 0.946 | n/m | 8.36 | 0.027 |
| Gore | Cage 2 | 49.00 | 285.50 | 4.47 | 1.56 | 23 | 184.0 | 1.07 | 0.847 | 34.61 | 10.98 | 0.018 |
| Gore | Cage 2 | 51.50 | 301.90 | 4.55 | 1.51 | 19 | 57.0 | 1.34 | 0.340 | 21.03 | 9.47 | 0.035 |
| Gore | Cage 2 | 53.50 | 411.00 | 6.04 | 1.47 | 25 | 127.5 | 3.98 | n/m | 44.10 | 9.74 | 0.031 |
| Mataura | Cage 1 | 49.00 | 237.70 | 3.64 | 1.53 | 18 | 150.3 | 2.82 | 0.873 | 63.79 | 9.40 | 0.051 |
| Mataura | Cage 1 | 46.50 | 227.80 | 4.13 | 1.81 | n/m | 169.2 | 8.70 | 0.935 | 79.22 | 12.25 | 0.042 |
| Mataura | Cage 2 | 55.00 | 424.70 | 6.46 | 1.52 | 17 | 216.5 | 1.32 | 0.797 | 82.00 | 9.78 | 0.021 |
| Mataura | Cage 2 | 61.10 | 599.00 | 8.45 | 1.41 | 18 | 45.1 | 1.55 | 0.756 | 112.90 | 20.22 | 0.077 |
| Mataura | Cage 2 | 51.00 | 289.20 | 4.06 | 1.40 | 21 | 197.4 | 0.94 | 0.772 | 71.50 | 11.24 | 0.026 |
| Mataura | Cage 2 | 58.80 | 442.90 | 5.66 | 1.28 | 18 | 269.1 | 2.73 | 0.586 | 75.71 | 9.47 | 0.028 |
| Mataura | Cage 2 | 49.00 | 265.30 | 3.36 | 1.27 | 22 | 290.6 | 1.79 | 0.811 | 72.65 | 14.65 | 0.038 |
| Tuturau | Cage 1 | 51.40 | 293.70 | 4.46 | 1.52 | 17 | n/m | 0.02 | n/m | 87.24 | 9.49 | 0.026 |
| Tuturau | Cage 1 | 59.70 | 565.80 | 6.51 | 1.15 | 22 | 154.1 | n/m | 0.926 | 73.72 | 10.78 | 0.024 |
| Tuturau | Cage 1 | 49.40 | 292.50 | 4.52 | 1.55 | 22 | 110.8 | 1.86 | 1.056 | 49.38 | 9.76 | 0.016 |
| Tuturau | Cage 1 | 46.00 | 217.00 | 4.25 | 1.96 | 20 | 103.1 | 2.36 | 0.707 | 37.79 | 8.58 | 0.021 |
| Tuturau | Cage 1 | 55.90 | 478.80 | 9.02 | 1.88 | 20 | 16.3 | 1.87 | 0.991 | 37.99 | 6.43 | 0.022 |
| Tuturau | Cage 2 | 51.00 | 341.80 | 4.80 | 1.40 | 18 | 177.6 | 2.82 | 1.005 | 42.41 | 4.93 | 0.025 |
| Tuturau | Cage 2 | 59.00 | 599.60 | 7.87 | 1.31 | 18 | 314.5 | 1.14 | 1.202 | 84.46 | 10.47 | 0.019 |
| Tuturau | Cage 2 | 47.70 | 222.00 | 3.23 | 1.45 | 24 | 211.4 | 3.31 | 0.798 | 57.18 | 7.93 | 0.018 |
| Tuturau | Cage 2 | 51.10 | 325.00 | 4.27 | 1.31 | 23 | 76.5 | 3.11 | 0.867 | 59.16 | 8.89 | 0.034 |
| Tuturau | Cage 2 | 50.00 | 274.10 | 3.18 | 1.16 | n/m | 223.4 | 2.73 | 1.375 | 48.67 | 9.05 | 0.026 |
| Wyndham | Cage 1 | 52.50 | 318.90 | 3.52 | 1.10 | 31 | 146.8 | 3.41 | 0.860 | 99.10 | 5.09 | 0.026 |
| Wyndham | Cage 1 | 51.30 | 315.00 | 5.90 | 1.87 | 20 | 185.7 | 2.95 | 0.824 | 83.63 | 12.61 | 0.025 |
| Wyndham | Cage 1 | 55.70 | 433.20 | 4.89 | 1.13 | 22 | 251.6 | 7.07 | 0.971 | 24.85 | 22.34 | 0.057 |
| Wyndham | Cage 1 | 52.70 | 328.70 | 4.79 | 1.46 | 25 | 171.1 | 3.42 | 0.630 | 77.11 | 12.19 | 0.020 |
| Wyndham | Cage 1 | 54.00 | 360.60 | 5.29 | 1.47 | 31 | 84.2 | 2.28 | 0.830 | 86.08 | 10.73 | 0.025 |
| Wyndham | Cage 2 | 48.30 | 301.00 | 3.37 | 1.12 | 20 | 275.2 | 4.20 | 1.079 | 71.85 | 8.78 | 0.020 |
| Wyndham | Cage 2 | 57.00 | 403.00 | 5.27 | 1.31 | 28 | 84.4 | 2.81 | 0.685 | 89.88 | 8.72 | 0.018 |
| Wyndham | Cage 2 | 50.40 | 275.70 | 4.21 | 1.53 | 21 | 44.1 | 3.44 | 0.539 | 73.90 | 4.56 | 0.025 |
| Gorge Rd | Cage 1 | 49.30 | 265.70 | 4.32 | 1.63 | 28 | 142.6 | n/m | 0.593 | 40.31 | 11.33 | 0.024 |
| Gorge Rd | Cage 1 | 50.60 | 264.00 | 4.39 | 1.66 | n/m | 177.0 | 1.63 | 0.810 | 33.47 | 6.22 | 0.025 |
| Gorge Rd | Cage 1 | 47.80 | 243.10 | 4.31 | 1.77 | n/m | 117.3 | 1.32 | 0.557 | 59.44 | 12.17 | 0.026 |
| Gorge Rd | Cage 1 | 49.10 | 228.30 | 3.67 | 1.61 | 16 | 95.0 | 1.54 | 0.987 | 28.03 | 6.35 | 0.016 |
| Gorge Rd | Cage 1 | 50.50 | 285.60 | 6.31 | 2.21 | 19 | n/m | 0.28 | n/m | n/m | n/m | n/m |
| Niagara | Cage 1 | 52.20 | 357.70 | 6.18 | 1.73 | 19 | 64.2 | 3.05 | 0.672 | 83.92 | 10.68 | 0.023 |
| Niagara | Cage 1 | 56.00 | 483.30 | 7.07 | 1.46 | 22 | 242.9 | 2.28 | 1.394 | 76.91 | 10.45 | 0.030 |
| Niagara | Cage 1 | 54.80 | 461.70 | 4.49 | 0.97 | 17 | 298.8 | 1.26 | 0.743 | 58.05 | 9.86 | 0.026 |
| Niagara | Cage 1 | 57.70 | 426.80 | 5.68 | 1.33 | 14 | 178.5 | 5.36 | 0.840 | 50.03 | 7.36 | 0.035 |
| Niagara | Cage 1 | 52.50 | 356.80 | 4.61 | 1.29 | 16 | 184.5 | 2.11 | 0.454 | 87.14 | 9.38 | 0.031 |
| Niagara | Cage 2 | 52.70 | 355.70 | 3.44 | 0.97 | 20 | 137.1 | 5.67 | 0.701 | 49.74 | 8.86 | 0.029 |
| Niagara | Cage 2 | 56.00 | 403.30 | 4.98 | 1.23 | 24 | 206.3 | 3.65 | 0.974 | 73.05 | 11.58 | 0.024 |
| Niagara | Cage 2 | 49.90 | 262.30 | 4.60 | 1.75 | 24 | n/m | n/m | 0.818 | 77.95 | 8.43 | 0.021 |
| Niagara | Cage 2 | 48.00 | 260.80 | 4.97 | 1.91 | 15 | 217.4 | 6.48 | 0.718 | 69.51 | 9.88 | 0.026 |
| Niagara | Cage 2 | 49.00 | 298.70 | 3.76 | 1.26 | 21 | 142.2 | 16.04 | 1.118 | 58.26 | 11.19 | 0.038 |
| Piano Flat | Resident | 64.00 | 635.90 | 7.84 | 1.23 | 21 | 405.7 | 7.09 | 0.936 | 64.62 | 9.16 | 0.014 |
| Piano Flat | Resident | 66.00 | 902.50 | 14.18 | 1.57 | 21 | 332.7 | 6.79 | 1.228 | 71.62 | 7.67 | 0.011 |
| Piano Flat | Resident | 101.00 | 3049.00 | 35.17 | 1.15 | 23 | 215.7 | 19.80 | 1.249 | 79.83 | 10.20 | 0.012 |
| Gore | Resident | 66.00 | 961.80 | 11.83 | 1.23 | n/m | 287.0 | 24.10 | 1.070 | n/m | 4.79 | 0.017 |
| Gore | Resident | 79.00 | 1460.70 | 19.30 | 1.32 | 26 | 254.1 | 39.22 | 0.760 | 49.43 | 6.31 | 0.014 |
| Gore | Resident | 58.00 | 614.60 | 6.21 | 1.01 | 24 | 152.1 | 78.38 | 1.159 | 45.65 | 8.96 | 0.009 |
| Gore | Resident | 51.00 | 273.40 | 3.69 | 1.35 | 17 | 265.8 | 36.48 | 0.894 | n/m | 4.24 | 0.010 |
| Gore | Resident | 69.50 | 617.90 | 7.97 | 1.29 | 22 | 130.8 | 33.48 | 0.766 | 47.68 | 5.71 | 0.011 |
| Gore | Resident | 54.00 | 409.10 | 4.64 | 1.13 | 26 | n/m | n/m | 1.023 | 49.05 | 5.56 | 0.011 |
| Gore | Resident | 51.50 | 418.80 | 7.31 | 1.75 | 13 | 104.5 | n/m | 0.508 | 46.34 | 5.48 | 0.009 |
| Gore | Resident | 54.00 | 414.00 | 4.31 | 1.04 | 22 | 164.1 | n/m | 1.117 | 34.51 | 4.76 | 0.007 |
| Gore | Resident | 59.60 | 277.90 | 3.51 | 1.26 | 18 | n/m | n/m | 0.899 | 45.51 | 4.68 | 0.010 |
| Mataura | Resident | 65.20 | 867.50 | 11.31 | 1.30 | 13 | 107.8 | 22.79 | 1.214 | 45.85 | 5.05 | 0.014 |
| Mataura | Resident | 58.80 | 596.70 | 8.33 | 1.40 | 21 | n/m | 48.11 | 1.206 | 58.43 | 7.86 | 0.025 |
| Mataura | Resident | 66.80 | 916.10 | 10.28 | 1.12 | 21 | 364.6 | 17.00 | 1.004 | 117.36 | 12.91 | n/m |
| Mataura | Resident | 63.00 | 627.70 | 6.81 | 1.08 | 17 | 176.9 | 20.98 | 1.025 | n/m | 8.07 | 0.018 |
| Mataura | Resident | 63.00 | 733.20 | 8.60 | 1.17 | n/m | 216.7 | 33.95 | 0.945 | 55.89 | 7.74 | 0.021 |
| Mataura | Resident | 57.00 | 452.10 | 4.22 | 0.93 | 21 | 89.2 | 30.26 | 0.922 | 56.85 | 7.75 | 0.014 |
| Mataura | Resident | 50.80 | 300.10 | 3.24 | 1.08 | n/m | 91.5 | 10.90 | 1.046 | 65.06 | 9.43 | 0.040 |
| Mataura | Resident | 58.50 | 383.50 | 4.17 | 1.09 | 27 | 223.0 | 27.20 | 1.116 | 81.32 | n/m | 0.051 |
| Mataura | Resident | 59.10 | 586.90 | 6.89 | 1.17 | 18 | 103.7 | 22.01 | 1.090 | 85.24 | 15.28 | 0.038 |
| Mataura | Resident | 56.00 | 439.60 | 5.15 | 1.17 | 20 | 138.9 | 19.93 | 1.164 | 88.87 | 9.73 | 0.042 |
| Tuturau | Resident | 47.40 | 296.40 | 4.26 | 1.44 | 13 | n/m | 15.60 | 1.114 | 46.72 | 7.16 | 0.023 |
| Tuturau | Resident | 48.90 | 328.20 | 4.40 | 1.34 | 17 | 78.0 | 30.82 | 0.989 | 56.73 | 6.35 | 0.022 |
| Tuturau | Resident | 57.90 | 620.50 | 8.62 | 1.39 | 22 | 108.6 | 16.71 | 0.698 | 58.46 | 7.99 | 0.020 |
| Tuturau | Resident | 50.00 | 315.10 | 4.30 | 1.36 | 16 | 93.4 | 22.41 | 1.200 | 51.45 | 4.44 | 0.015 |
| Tuturau | Resident | 54.60 | 355.70 | 4.24 | 1.19 | 19 | 229.8 | 13.88 | 0.675 | 81.75 | 9.37 | 0.034 |
| Tuturau | Resident | 53.00 | 342.00 | 4.77 | 1.39 | 20 | 55.9 | 15.20 | 0.921 | 59.58 | 9.79 | 0.033 |
| Tuturau | Resident | 59.60 | 624.80 | 7.72 | 1.24 | 14 | 250.6 | 8.73 | 0.703 | 62.68 | 5.75 | 0.022 |
| Tuturau | Resident | 52.50 | 384.70 | 4.27 | 1.11 | 18 | 346.7 | 9.71 | 0.610 | 72.01 | 2.48 | 0.013 |
| Tuturau | Resident | 51.60 | 305.60 | 3.45 | 1.13 | 20 | 194.9 | 16.96 | 1.130 | 43.01 | 8.76 | 0.011 |
| Tuturau | Resident | 47.50 | 206.70 | 2.49 | 1.20 | 13 | 252.3 | 22.69 | 1.281 | 33.48 | 11.79 | 0.018 |
| Wyndham | Resident | 47.10 | 248.30 | 4.59 | 1.85 | 18 | 78.8 | 9.18 | 0.494 | 30.96 | n/m | 0.013 |
| Wyndham | Resident | 45.70 | 215.60 | 3.15 | 1.46 | 15 | 268.1 | 34.86 | 1.134 | 68.59 | 11.04 | 0.018 |
| Wyndham | Resident | 62.60 | 715.30 | 8.78 | 1.23 | 26 | 204.4 | 26.38 | 0.985 | 86.80 | 8.98 | 0.037 |
| Wyndham | Resident | 51.90 | 318.50 | 3.24 | 1.02 | n/m | 333.1 | 19.26 | 1.325 | 77.65 | 7.70 | 0.037 |
| Niagara | Resident | 50.70 | 364.40 | 6.91 | 1.90 | n/m | 212.2 | 32.15 | 0.420 | 67.38 | 7.29 | 0.018 |
| Niagara | Resident | 45.90 | 218.30 | 2.75 | 1.26 | 29 | 131.8 | 31.07 | 1.502 | 70.97 | 11.66 | 0.054 |
| Niagara | Resident | 48.50 | 228.90 | 3.25 | 1.42 | 30 | 108.1 | 15.14 | 0.650 | 75.86 | 8.55 | 0.014 |
| Niagara | Resident | 66.00 | 798.20 | 11.66 | 1.46 | 23 | n/m | 21.48 | 0.999 | 60.06 | 10.13 | 0.015 |
| Niagara | Resident | 44.90 | 207.10 | 3.22 | 1.55 | 23 | 154.1 | 20.83 | 0.890 | 71.01 | n/m | 0.014 |
| Niagara | Resident | 47.00 | 213.60 | 2.43 | 1.14 | n/m | 231.6 | 9.90 | 0.579 | 81.28 | 9.81 | 0.014 |
| Niagara | Resident | 50.50 | 371.40 | 5.67 | 1.53 | n/m | 120.9 | 15.86 | 0.433 | 88.95 | 8.20 | 0.025 |
| Niagara | Resident | 46.50 | 248.20 | 5.19 | 2.09 | 21 | 181.7 | 9.81 | 0.421 | 69.97 | 6.49 | 0.014 |
| Niagara | Resident | 44.20 | 235.30 | 4.55 | 1.93 | n/m | 182.7 | 33.72 | 0.617 | 99.93 | 7.63 | 0.020 |
| Niagara | Resident | 54.90 | 243.30 | 1.52 | 0.62 | 20 | 119.5 | 3.78 | 1.330 | 74.54 | n/m | 0.032 |

n/m: not measured

**Summer sampling**

| **Site** | **Eels location** | **Length (cm)** | **Weight (g)** | **Liver weight (g)** | **HSI** | **Age (years)** | **GST liver (nmol./min./mg of protein)** | **EROD activity Liver (nmol./min./mg of protein)** | **TBARS Liver (nmol./mg of protein)** | **GST Gills (nmol./min./mg of protein)** | **CAT Gills (nmol./min./mg of protein)** | **TBARS Gills (nmol./mg of protein)** |
| --- | --- | --- | --- | --- | --- | --- | --- | --- | --- | --- | --- | --- |
| Piano Flat | Cage 1 | 74.70 | 1087.10 | 11.21 | 1.03 | 31 | 599.0 | n/m | n/m | 96.6 | 2.69 | 0.020 |
| Piano Flat | Cage 1 | 61.20 | 482.00 | 4.81 | 1.00 | 16 | 639.8 | 0.30 | 0.042 | n/m | n/m | 0.012 |
| Piano Flat | Cage 2 | 51.40 | 285.30 | 4.76 | 1.67 | 22 | 404.0 | n/m | 0.042 | 135.9 | 4.59 | 0.014 |
| Piano Flat | Cage 2 | 53.80 | 296.00 | 4.74 | 1.60 | 21 | 536.7 | 0.28 | 0.031 | 80.8 | 3.00 | 0.031 |
| Piano Flat | Cage 2 | 50.40 | 232.60 | 4.30 | 1.85 | 25 | 455.4 | 0.23 | 0.051 | 43.4 | 5.15 | 0.018 |
| Piano Flat | Cage 2 | 56.00 | 306.10 | 6.16 | 2.01 | n/m | 669.5 | n/m | 0.053 | 89.5 | 4.04 | 0.029 |
| Piano Flat | Cage 2 | 50.50 | 304.10 | 5.50 | 1.81 | 17 | 515.6 | 0.69 | 0.039 | 80.7 | 4.39 | 0.011 |
| Gore | Cage 1 | 49.50 | 230.80 | 3.60 | 1.56 | 18 | 469.7 | 1.25 | 0.052 | 91.9 | 4.27 | 0.015 |
| Gore | Cage 1 | 48.00 | 210.50 | 2.82 | 1.34 | 20 | 549.8 | 0.77 | 0.036 | 147.8 | 4.39 | 0.017 |
| Gore | Cage 1 | 47.40 | 237.70 | 3.45 | 1.45 | 21 | 587.8 | 0.54 | 0.051 | 157.2 | 6.29 | 0.019 |
| Gore | Cage 1 | 52.50 | 251.50 | 3.89 | 1.55 | n/m | 585.0 | n/m | 0.044 | 115.6 | 7.38 | 0.023 |
| Gore | Cage 1 | 52.50 | 251.90 | 3.85 | 1.53 | 23 | 507.9 | 1.09 | 0.035 | 115.4 | 5.93 | 0.017 |
| Gore | Cage 2 | 42.90 | 156.00 | 2.45 | 1.57 | n/m | 419.1 | 1.23 | 0.050 | 104.4 | 3.11 | 0.010 |
| Gore | Cage 2 | 49.90 | 256.60 | 3.08 | 1.20 | 23 | 469.6 | 1.20 | 0.041 | 138.8 | 6.94 | 0.020 |
| Gore | Cage 2 | 48.00 | 204.20 | 3.20 | 1.57 | 18 | 786.8 | 0.83 | 0.028 | 112.4 | 4.68 | 0.011 |
| Gore | Cage 2 | 53.60 | 294.90 | 5.31 | 1.80 | n/m | 429.3 | n/m | 0.021 | 123.2 | 6.49 | 0.016 |
| Gore | Cage 2 | 47.60 | 209.90 | 2.79 | 1.33 | n/m | 443.7 | 1.30 | 0.021 | 93.0 | 7.63 | 0.015 |
| Mataura | Cage 1 | 68.60 | 499.90 | 4.63 | 0.93 | 21 | 639.0 | n/m | 0.023 | 140.0 | n/m | 0.017 |
| Mataura | Cage 1 | 50.00 | 175.80 | 3.65 | 2.08 | 22 | 498.0 | 0.23 | 0.040 | 128.1 | 6.07 | 0.023 |
| Mataura | Cage 1 | 60.00 | 467.00 | 7.07 | 1.51 | 24 | 739.0 | 1.28 | 0.049 | 73.9 | 4.92 | 0.017 |
| Mataura | Cage 1 | 45.40 | 215.80 | 3.18 | 1.47 | 20 | 508.8 | 0.71 | 0.059 | 197.6 | 4.34 | 0.015 |
| Mataura | Cage 2 | 54.20 | 293.20 | 2.94 | 1.00 | 20 | 845.0 | 1.15 | 0.054 | 106.9 | 2.59 | 0.012 |
| Mataura | Cage 2 | 56.40 | 291.10 | 3.42 | 1.18 | 25 | 702.2 | 0.03 | 0.058 | 170.1 | 5.36 | 0.021 |
| Mataura | Cage 2 | 58.10 | 397.90 | 5.98 | 1.50 | 16 | 547.1 | 5.97 | 0.045 | 119.6 | 4.02 | 0.014 |
| Mataura | Cage 2 | 43.50 | 125.70 | 2.23 | 1.77 | 21 | 399.1 | 5.72 | 0.049 | 113.2 | 2.74 | 0.010 |
| Mataura | Cage 2 | 49.80 | 232.50 | 3.96 | 1.70 | 19 | 738.0 | 1.06 | 0.033 | n/m | 5.42 | 0.025 |
| Tuturau | Cage 1 | 52.70 | 345.00 | 5.30 | 1.54 | 24 | n/m | 1.70 | 0.052 | 112.1 | 6.28 | 0.026 |
| Tuturau | Cage 1 | 49.50 | 160.50 | 3.20 | 1.99 | 15 | 465.8 | 1.27 | 0.037 | 131.2 | 3.42 | 0.014 |
| Tuturau | Cage 1 | 48.20 | 186.20 | 3.07 | 1.65 | 22 | 532.9 | 0.72 | 0.032 | 127.9 | 4.86 | 0.012 |
| Tuturau | Cage 1 | 79.80 | 1027.80 | 9.22 | 0.90 | n/m | 747.0 | 1.11 | 0.049 | 138.1 | n/m | 0.022 |
| Tuturau | Cage 1 | 48.80 | 229.30 | 3.74 | 1.63 | 24 | 436.3 | 1.28 | 0.030 | 74.8 | 5.31 | 0.008 |
| Tuturau | Cage 2 | 59.10 | 331.20 | 2.94 | 0.89 | 16 | 490.5 | 0.50 | 0.041 | 146.9 | n/m | 0.017 |
| Tuturau | Cage 2 | 63.20 | n/m | 6.83 | n/m | 20 | 727.6 | 2.03 | 0.038 | 99.8 | 5.40 | 0.017 |
| Wyndham | Cage 1 | 54.50 | 366.50 | 4.07 | 1.11 | 29 | 671.5 | 0.30 | 0.037 | 92.9 | 3.49 | 0.012 |
| Wyndham | Cage 1 | 54.30 | 286.40 | 4.34 | 1.51 | 21 | 627.5 | 1.26 | 0.048 | 187.8 | 5.79 | 0.018 |
| Wyndham | Cage 1 | 49.00 | 204.10 | 3.47 | 1.70 | 22 | 192.0 | 2.11 | 0.044 | 110.3 | 3.09 | 0.012 |
| Wyndham | Cage 1 | 49.40 | 175.20 | 3.64 | 2.08 | 25 | 449.9 | 1.13 | 0.025 | 115.4 | 6.11 | 0.019 |
| Wyndham | Cage 2 | 54.40 | 239.70 | 3.67 | 1.53 | n/m | 527.9 | 0.74 | 0.020 | 126.3 | 5.54 | 0.014 |
| Wyndham | Cage 2 | 51.00 | 256.00 | 4.05 | 1.58 | n/m | 638.4 | 1.32 | 0.017 | 140.7 | 6.61 | 0.010 |
| Wyndham | Cage 2 | 54.50 | 325.50 | 4.79 | 1.47 | 29 | 620.2 | 6.91 | 0.050 | 110.7 | 4.24 | 0.015 |
| Wyndham | Cage 2 | 59.50 | 357.10 | 4.77 | 1.34 | 23 | 403.1 | 0.44 | 0.039 | 90.4 | 5.91 | 0.024 |
| Wyndham | Cage 2 | 43.30 | 122.50 | 4.27 | 3.49 | 22 | 581.9 | 0.78 | 0.045 | 147.8 | 5.11 | 0.021 |
| Gorge Rd | Cage 1 | 54.40 | 291.20 | 4.20 | 1.44 | 25 | 717.0 | 1.97 | 0.027 | 120.3 | 4.96 | 0.010 |
| Gorge Rd | Cage 2 | 45.60 | 175.60 | 3.37 | 1.92 | 20 | 332.7 | 3.92 | 0.042 | 83.8 | 3.96 | 0.035 |
| Gorge Rd | Cage 2 | 48.00 | 175.20 | 3.17 | 1.81 | 21 | 560.6 | 3.09 | 0.025 | 108.9 | 5.44 | 0.017 |
| Gorge Rd | Cage 2 | 49.50 | 210.00 | 4.13 | 1.97 | 17 | 497.1 | 1.24 | 0.044 | 111.3 | 4.55 | 0.016 |
| Niagara | Cage 1 | 49.30 | 250.00 | 3.39 | 1.35 | 21 | 576.3 | 0.46 | 0.024 | 109.7 | 6.55 | 0.026 |
| Niagara | Cage 1 | 50.00 | 268.60 | 3.84 | 1.43 | n/m | 635.8 | 1.13 | 0.019 | 88.2 | 6.61 | 0.024 |
| Niagara | Cage 1 | 51.10 | 242.80 | 3.91 | 1.61 | n/m | 351.6 | 0.86 | 0.044 | 136.5 | 4.68 | 0.012 |
| Niagara | Cage 1 | 47.40 | 216.00 | 3.27 | 1.52 | 13 | 501.7 | 1.86 | 0.034 | 95.5 | 6.41 | 0.009 |
| Niagara | Cage 1 | 48.60 | 204.50 | 3.79 | 1.85 | 14 | 452.6 | 1.73 | 0.031 | 112.6 | 4.79 | 0.024 |
| Niagara | Cage 2 | 46.00 | 229.20 | 3.64 | 1.59 | 18 | 594.4 | 1.26 | 0.023 | 124.9 | 8.38 | 0.032 |
| Niagara | Cage 2 | 56.50 | 285.20 | 4.20 | 1.47 | 21 | 709.3 | 1.11 | 0.025 | 177.5 | 4.73 | 0.025 |
| Niagara | Cage 2 | 50.40 | 230.00 | 3.67 | 1.60 | 17 | 397.8 | 1.88 | 0.050 | 116.3 | 3.60 | 0.023 |
| Niagara | Cage 2 | 59.50 | 444.20 | 4.63 | 1.04 | 23 | n/m | 1.51 | 0.041 | 124.0 | 8.24 | 0.010 |
| Niagara | Cage 2 | 56.50 | 334.70 | 3.99 | 1.19 | 20 | 623.5 | 1.38 | 0.042 | 114.4 | 5.41 | 0.014 |
| Piano Flat | Resident | 77.3 | 1426 | 12.70 | 0.89 | 28 | 730.3 | 6.75 | 0.020 | 105.4 | 3.04 | 0.016 |
| Piano Flat | Resident | 84 | 1419.9 | 16.77 | 1.18 | n/a | 679.1 | 6.37 | 0.022 | 125.2 | n/m | 0.013 |
| Piano Flat | Resident | 57 | 297 | 4.71 | 1.59 | n/a | 386.9 | 1.26 | 0.040 | 147.7 | 3.81 | 0.011 |
| Piano Flat | Resident | 59.5 | 533 | 22.00 | 4.13 | 24 | 641.1 | 6.14 | 0.041 | 131.5 | 3.22 | 0.008 |
| Piano Flat | Resident | 74.5 | 996 | 13.61 | 1.37 | n/a | 596.2 | 5.03 | 0.043 | 198.4 | 4.36 | 0.011 |
| Piano Flat | Resident | 86 | 2047 | 30.24 | 1.48 | n/a | 437.4 | 6.08 | 0.022 | 128.7 | 4.64 | 0.015 |
| Gore | Resident | 56.4 | 428 | 4.68 | 1.09 | 21 | 597.3 | 7.76 | 0.024 | 152.3 | 5.07 | 0.019 |
| Gore | Resident | 61.5 | 537 | 5.69 | 1.06 | 16 | 508.4 | 4.82 | 0.019 | 122.8 | 6.61 | 0.014 |
| Gore | Resident | 51.7 | 381.3 | 4.69 | 1.23 | 20 | 479.4 | 5.85 | 0.047 | 143.9 | 5.76 | 0.013 |
| Gore | Resident | 56.5 | 464 | 6.13 | 1.32 | 20 | 797.2 | 4.79 | 0.015 | 137.8 | 5.42 | 0.012 |
| Gore | Resident | 60.5 | 643.5 | 6.62 | 1.03 | 22 | 601.0 | 7.77 | 0.032 | 129.5 | 5.08 | 0.009 |
| Gore | Resident | 54.7 | 401.4 | 3.80 | 0.95 | n/m | 631.4 | 5.67 | 0.029 | 122.9 | 5.37 | 0.009 |
| Gore | Resident | 62.3 | 599.9 | 7.69 | 1.28 | n/m | 824.9 | 7.94 | 0.032 | 157.9 | 5.62 | 0.011 |
| Gore | Resident | 53.4 | 359.9 | 3.75 | 1.04 | 13 | 541.9 | 4.79 | 0.037 | 112.5 | 5.56 | 0.018 |
| Gore | Resident | 49 | 275 | 4.27 | 1.55 | 14 | 477.3 | 6.18 | 0.046 | 192.1 | 5.53 | 0.013 |
| Gore | Resident | 50.4 | 308.8 | 5.29 | 1.71 | 21 | 561.7 | 11.87 | 0.032 | 130.6 | 4.11 | 0.015 |
| Mataura | Resident | 51.2 | 243.1 | 2.42 | 0.99 | 17 | 871.0 | 1.40 | 0.043 | 132.4 | 5.49 | 0.012 |
| Mataura | Resident | 45.5 | 260 | 2.54 | 0.98 | n/m | 723.5 | 2.04 | 0.023 | 142.8 | 6.04 | 0.019 |
| Mataura | Resident | 54.5 | 355 | 3.50 | 0.99 | n/m | 684.3 | 1.41 | 0.022 | 129.2 | 5.25 | 0.012 |
| Mataura | Resident | 57.3 | 436.4 | 4.77 | 1.09 | 16 | 403.5 | 3.22 | 0.037 | 65.1 | 5.18 | 0.012 |
| Mataura | Resident | 43.4 | 151.5 | 3.19 | 2.11 | 13 | 720.4 | 1.60 | 0.029 | 133.7 | 4.49 | 0.030 |
| Mataura | Resident | 51.8 | 235 | 3.14 | 1.34 | 16 | 707.0 | 3.39 | n/m | 103.9 | 5.41 | 0.011 |
| Mataura | Resident | 60.5 | 535.5 | 7.17 | 1.34 | 21 | 702.3 | 2.02 | 0.041 | 195.1 | 4.61 | 0.010 |
| Mataura | Resident | 48.2 | 202 | 2.14 | 1.06 | 20 | 809.7 | 3.73 | 0.034 | 115.9 | 5.12 | 0.009 |
| Mataura | Resident | 52.7 | 349.7 | 3.18 | 0.91 | 18 | 771.0 | 1.36 | 0.045 | 109.8 | 7.01 | 0.027 |
| Mataura | Resident | 67.5 | 624 | 7.90 | 1.27 | n/m | 847.0 | 2.37 | 0.043 | 100.8 | 5.50 | 0.009 |
| Tuturau | Resident | 61.7 | 588.8 | 8.512 | 1.45 | n/m | 528.0 | 5.74 | 0.025 | 130.2 | 5.20 | 0.014 |
| Tuturau | Resident | 67.3 | 632.4 | 5.62 | 0.89 | n/m | 730.3 | 1.77 | 0.034 | 87.6 | 5.42 | 0.010 |
| Tuturau | Resident | 67.5 | 873.1 | 12.544 | 1.44 | n/m | n/m | 3.49 | 0.039 | 147.1 | 5.48 | 0.018 |
| Tuturau | Resident | 63.8 | 394.2 | 6.468 | 1.64 | n/m | 665.6 | 2.24 | 0.038 | 175.3 | 6.64 | 0.027 |
| Tuturau | Resident | 59 | 541.2 | 8.467 | 1.56 | n/a | 674.3 | 4.50 | 0.027 | 84.8 | 5.57 | 0.023 |
| Tuturau | Resident | 70.1 | 824.5 | 10.116 | 1.23 | 24 | 592.7 | 2.61 | 0.024 | 168.4 | 4.21 | 0.012 |
| Tuturau | Resident | 63.9 | 637.5 | 10.462 | 1.64 | 18 | 485.2 | 2.99 | 0.026 | 131.0 | 3.94 | 0.007 |
| Tuturau | Resident | 61.2 | 580.8 | 10.725 | 1.85 | 16 | 455.4 | 3.24 | 0.036 | 90.9 | 4.08 | 0.014 |
| Tuturau | Resident | 55.5 | 392.2 | n/m | n/m | n/m | 655.4 | 2.53 | 0.021 | 105.4 | 5.41 | 0.015 |
| Tuturau | Resident | 691 | 834.6 | 12.788 | 1.53 | n/m | 762.5 | 6.82 | 0.025 | 127.5 | 5.49 | 0.026 |
| Wyndham | Resident | 81.7 | 1150 | 13.91 | 1.21 | 17 | 809.1 | 5.90 | 0.022 | 151.5 | n/m | 0.020 |
| Wyndham | Resident | 53.4 | 310 | 4.17 | 1.35 | 17 | 674.6 | n/m | 0.016 | 107.1 | 5.41 | 0.017 |
| Wyndham | Resident | 47.7 | 269 | 4.78 | 1.78 | n/m | 550.3 | 11.38 | 0.021 | 156.5 | 4.79 | 0.012 |
| Wyndham | Resident | 80.1 | 1035 | 10.87 | 1.05 | 15 | 614.8 | 4.12 | 0.016 | 169.0 | n/m | 0.016 |
| Wyndham | Resident | 54.9 | 389 | 5.55 | 1.43 | 22 | 754.4 | 10.79 | 0.016 | 142.7 | 6.12 | 0.016 |
| Gorge Rd | Resident | 44 | 198 | 3.353 | 1.69 | n/m | 629.0 | 9.12 | 0.013 | 147.3 | 4.90 | 0.016 |
| Gorge Rd | Resident | 48.3 | 255.2 | 3.221 | 1.26 | 17 | 564.4 | 3.25 | 0.019 | 80.8 | 7.38 | 0.016 |
| Gorge Rd | Resident | 48.7 | 258.2 | 3.128 | 1.21 | n/m | 672.8 | 5.59 | 0.014 | 106.9 | 6.14 | 0.013 |
| Gorge Rd | Resident | 51.9 | 360 | 4.646 | 1.29 | n/m | 565.0 | 8.63 | 0.017 | 125.0 | 5.14 | 0.011 |
| Niagara | Resident | 52.10 | 318.80 | 2.75 | 0.86 | n/m | 651.5 | 1.38 | 0.016 | 140.5 | 5.35 | 0.017 |
| Niagara | Resident | 57.00 | 420.70 | 6.76 | 1.61 | 18 | 301.3 | 1.02 | 0.020 | 202.7 | 3.83 | 0.013 |
| Niagara | Resident | 54.00 | 360.00 | 3.68 | 1.02 | n/m | 603.2 | 1.83 | 0.025 | 173.8 | 6.31 | 0.014 |
| Niagara | Resident | 44.50 | 205.60 | 2.37 | 1.15 | n/m | 483.6 | 6.52 | 0.017 | 95.4 | 4.87 | 0.011 |

n/m: not measured
